# Supplementary material
Source: publisher figshare collection journal article supplement (https://karger.figshare.com/articles/dataset/_/6668867)
Supplement: Supplementary file 1 [file 1]

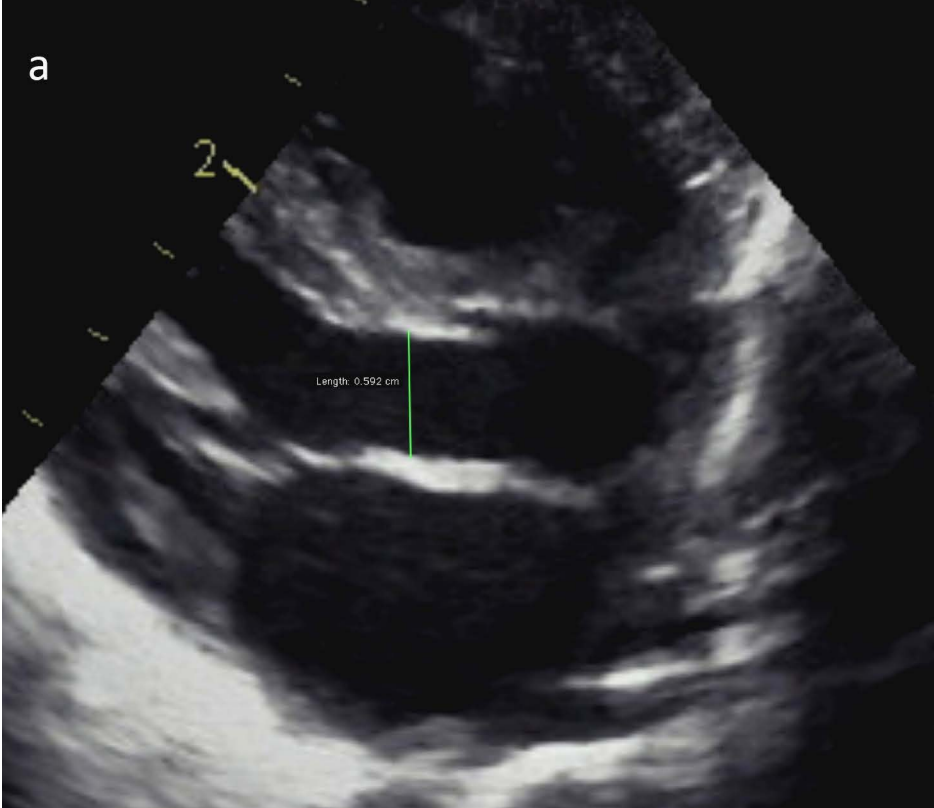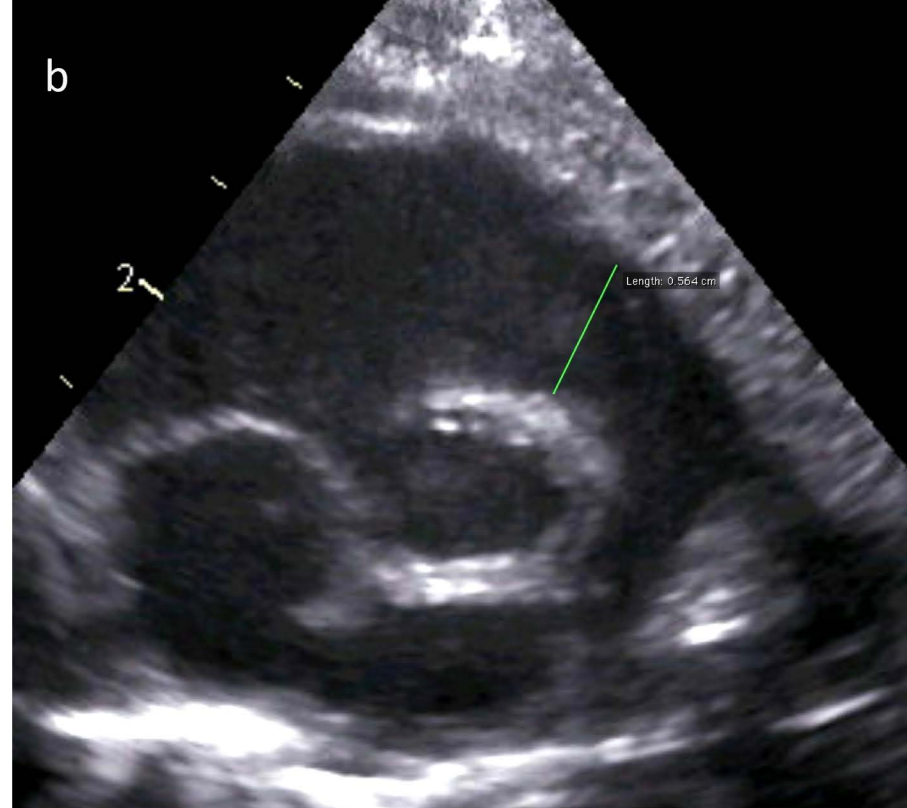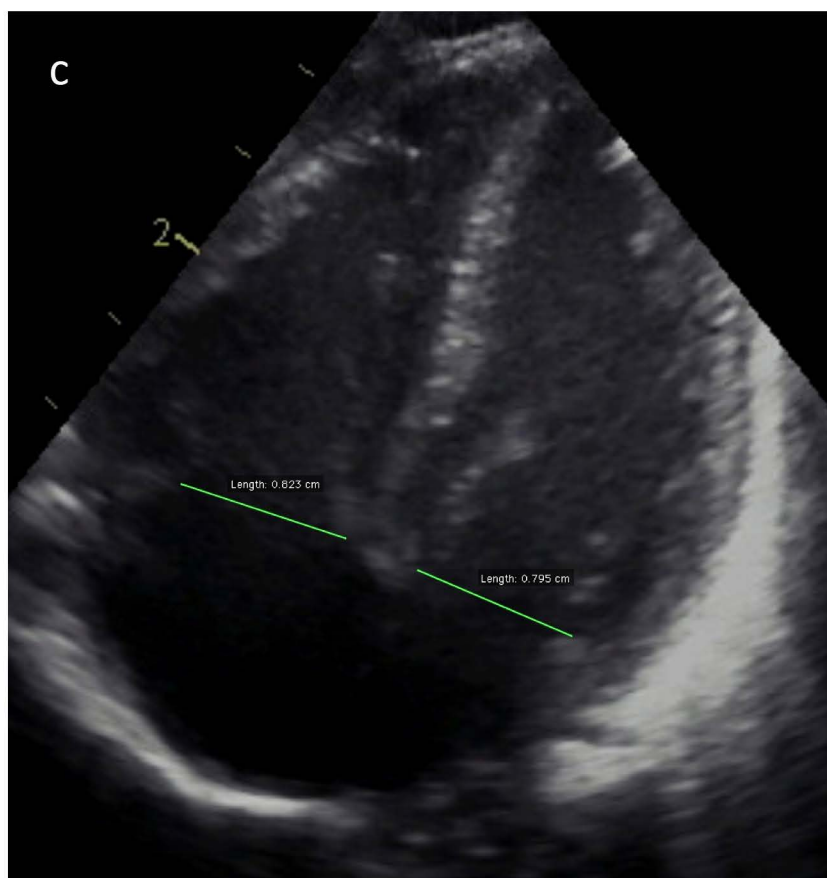

Supplementary figure 1. Valve imaging and offline measurement of valve annulus size from hinge point to hinge point at maximum expansion.

a Aortic valve in parasternal long axis view during peak systole

b Pulmonary valve in parasternal short axis view during peak systole

c Mitral and tricuspid valves in apical four-chamber view during peak diastole
